# Supplementary material for: Genetic Profiles of Aggressive Variants of Papillary Thyroid Carcinomas
Source: PubMed Central journal article supplement (PMC7924361; doi:10.3390/cancers13040892), 2021-02-20
Supplement: cancers-13-00892-s001.pdf [file cancers-13-00892-s001.pdf]

# Genetic Profiles of Aggressive Variants of Papillary Thyroid Carcinomas

Meihua Jin, Dong Eun Song, Jonghwa Ahn, Eyun Song, Yu-Mi Lee, Tae-Yon Sung, Tae Yong Kim, Won Bae Kim, Young Kee Shong, Min Ji Jeon and Won Gu Kim

**Table S1.** List of 50 target genes.

|                      |                |                |               |                |
|----------------------|----------------|----------------|---------------|----------------|
| <i>TERT</i> promoter | <i>BRAF</i>    | <i>NRAS</i>    | <i>HRAS</i>   | <i>KRAS</i>    |
| <i>E1F1AX</i>        | <i>TP53</i>    | <i>RB1</i>     | <i>NF1</i>    | <i>NF2</i>     |
| <i>PTEN</i>          | <i>PI3K3CA</i> | <i>ATM</i>     | <i>MEN1</i>   | <i>ARID1B</i>  |
| <i>TSHR</i>          | <i>MED12</i>   | <i>RBM10</i>   | <i>ARID2</i>  | <i>POLE</i>    |
| <i>PPM1D</i>         | <i>STK11</i>   | <i>CHEK2</i>   | <i>ZFHX3</i>  | <i>BDP1</i>    |
| <i>KMT2A</i>         | <i>KMT2C</i>   | <i>TG</i>      | <i>EZH1</i>   | <i>APC</i>     |
| <i>AKT1</i>          | <i>SPOP</i>    | <i>ALK</i>     | <i>RET</i>    | <i>PIK3C2G</i> |
| <i>PIK3CG</i>        | <i>AKT3</i>    | <i>TSC2</i>    | <i>MTOR</i>   | <i>ARID1A</i>  |
| <i>ARID1B</i>        | <i>ARID5B</i>  | <i>SMARCB1</i> | <i>PBRM1</i>  | <i>ARTX</i>    |
| <i>KMT2D</i>         | <i>MSH2</i>    | <i>FGFR3</i>   | <i>PDGFRB</i> | <i>ERBB3</i>   |

**Table S2.** Comparison of genetic profile of TCV-PTC and CCV-PTC.

| Pathological Subtypes of Thyroid Cancer   | TCV-PTC | CCV-PTC | <i>p</i> -value |
|-------------------------------------------|---------|---------|-----------------|
| <b>Driver genes</b>                       | 92%     | 82%     | 0.78            |
| <i>BRAF</i>                               | 92%     | 73%     | 0.33            |
| <i>NRAS</i>                               | 0%      | 9%      | 0.69            |
| <b><i>TERT</i> promoter</b>               | 17%     | 18%     | 0.99            |
| <b>Tumor suppressor genes</b>             | 25%     | 18%     | 0.99            |
| <i>ZFHX3</i>                              | 17%     | 9%      | 0.94            |
| <i>TP53</i>                               | 4%      | 0%      | 0.99            |
| <i>CHEK2</i>                              | 4%      | 9%      | 0.99            |
| <b>Key pathways and functional groups</b> | 33%     | 36%     | 0.99            |
| HMTs                                      | 8%      | 18%     | 0.78            |
| SWI/SNF complex                           | 17%     | 9%      | 0.94            |
| PI3K/AKT/mTOR pathway                     | 13%     | 9%      | 0.99            |

Abbreviation: TCV, tall cell variant; PTC, papillary thyroid carcinoma; CCV, columnal cell variant; HMTs, histone methyltransferase.

**Table S3.** *BRAF* and *NRAS* mutation in TCV-PTC patients.

| TCV-PTC     | TCV-PTC of PTC-TCGA<br>( <i>n</i> = 29) | TCV-PTC of Current Study<br>( <i>n</i> = 25) |
|-------------|-----------------------------------------|----------------------------------------------|
| <i>BRAF</i> | 97%                                     | 92%                                          |
| <i>NRAS</i> | 0%                                      | 0%                                           |

Abbreviation: TCV: Tall cell variant, PTC: papillary thyroid carcinoma, TCGA: The Cancer Genome Atlas.
